# Supplementary material for: Effects of Essential Amino Acid Deficiency on General Control Nonderepressible 2/Eukaryotic Initiation Factor 2 Signaling and Proteomic Changes in Primary Bovine Mammary Epithelial Cells
Source: MDPI journal article supplement (doi:10.3390/cimb44030071), 2022-02-25
Supplement: s1 [file s1]

## Supplementary Materials

a)

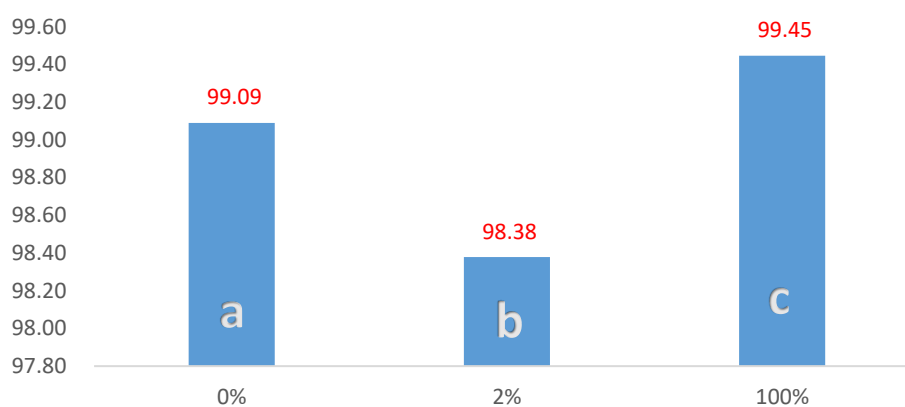

b)

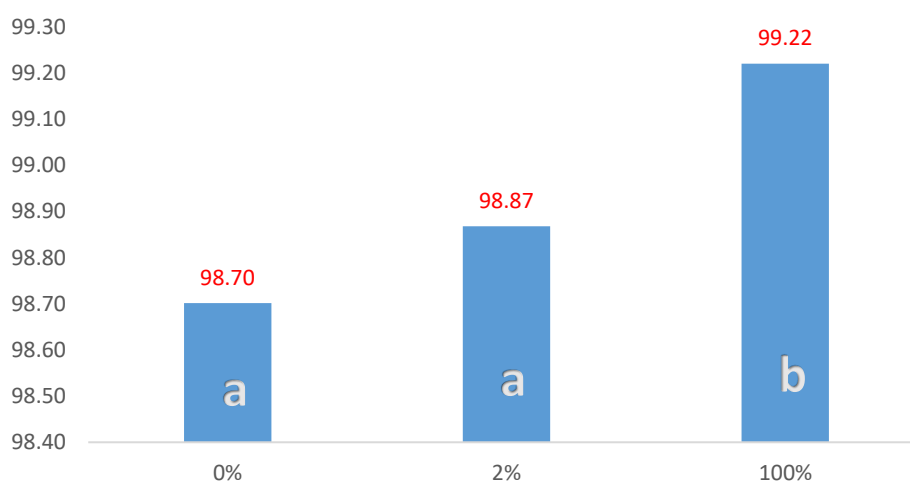

c)

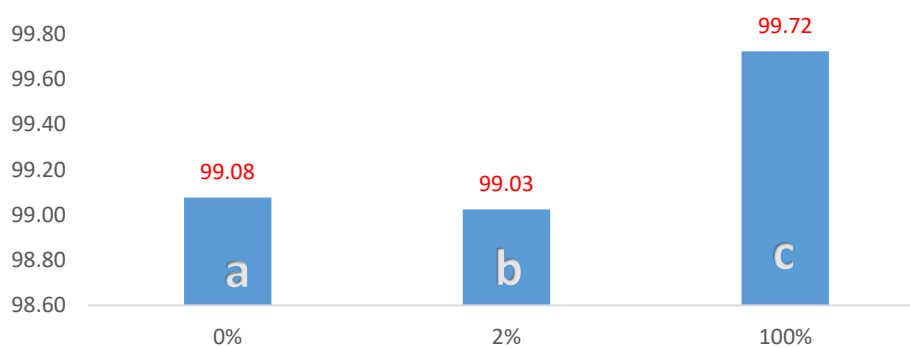

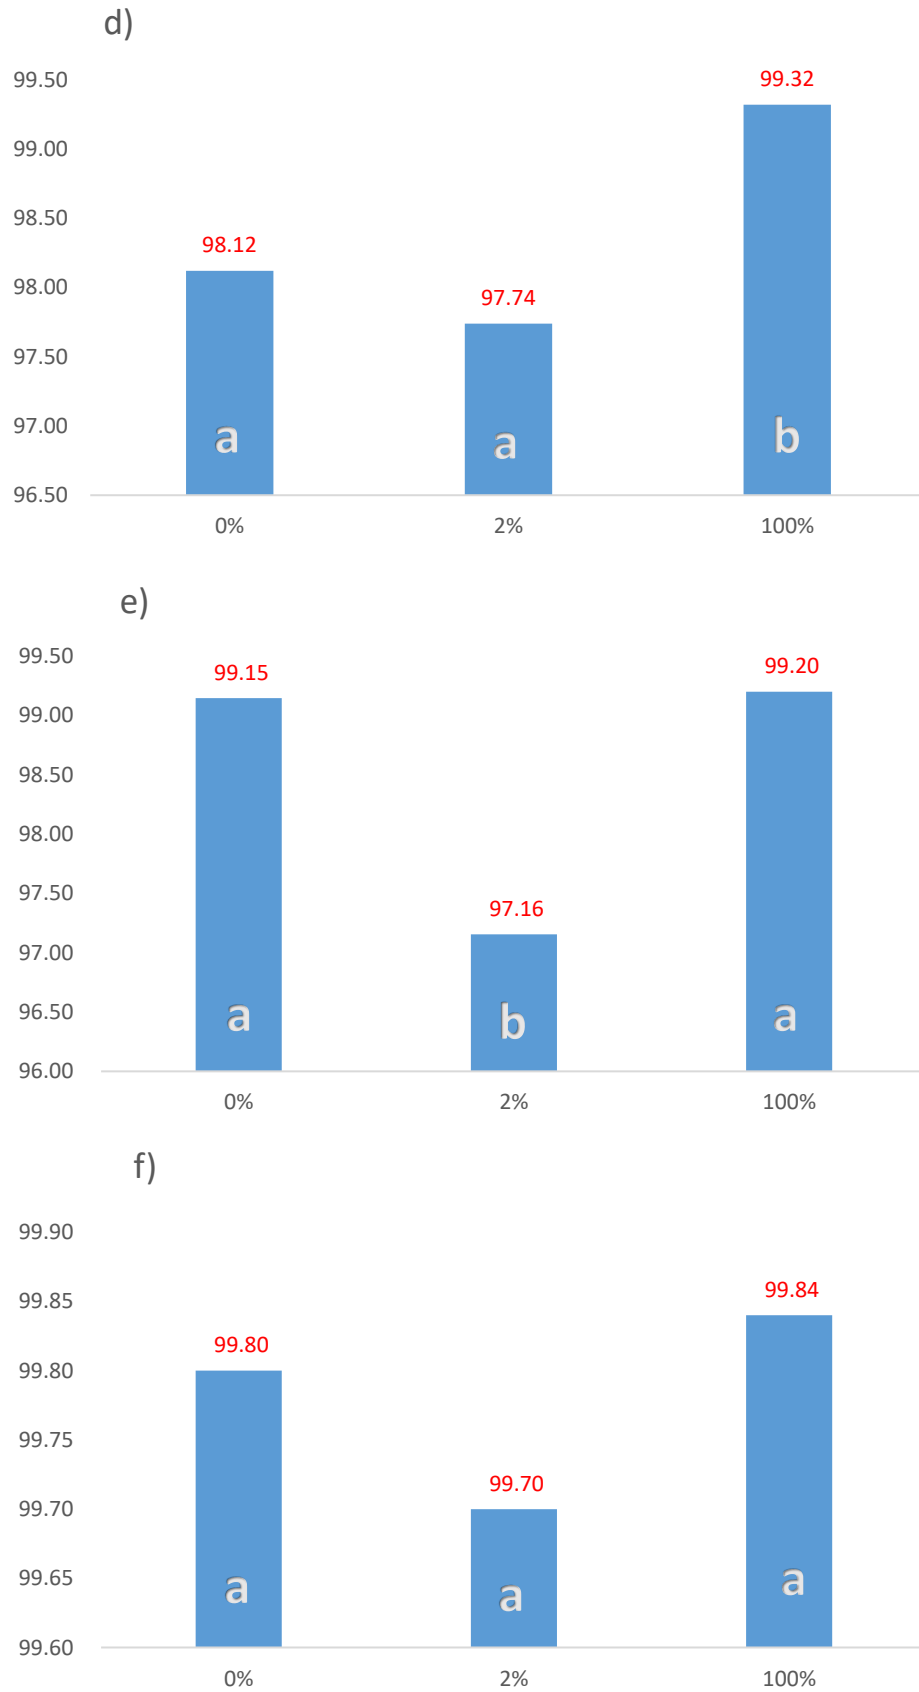

**Figure S1. Cell viability (%)** of four different experiments (medians) of MEC in culture for 6 days after confluence. Essential amino acids (EAA) were added at doses of 0%, 2%, and 100% of complete DMEM concentrations for 8 h & 24 h and repletion (R) was done with 100% EAA for 8 h & 24 h. **(a)** 8 h depletion (D): 0% and 2% EAA. **(b)** 24 h D. **(c)** 8 h D + 8 h R. **(d)** 8 h D + 24 h R. **(e)** 24 h D + 8 h R.

(f) 24 h D + 24 h R. In red, min. and max. values. Columns with different letters depict significant differences ( $p < 0.05$ ).

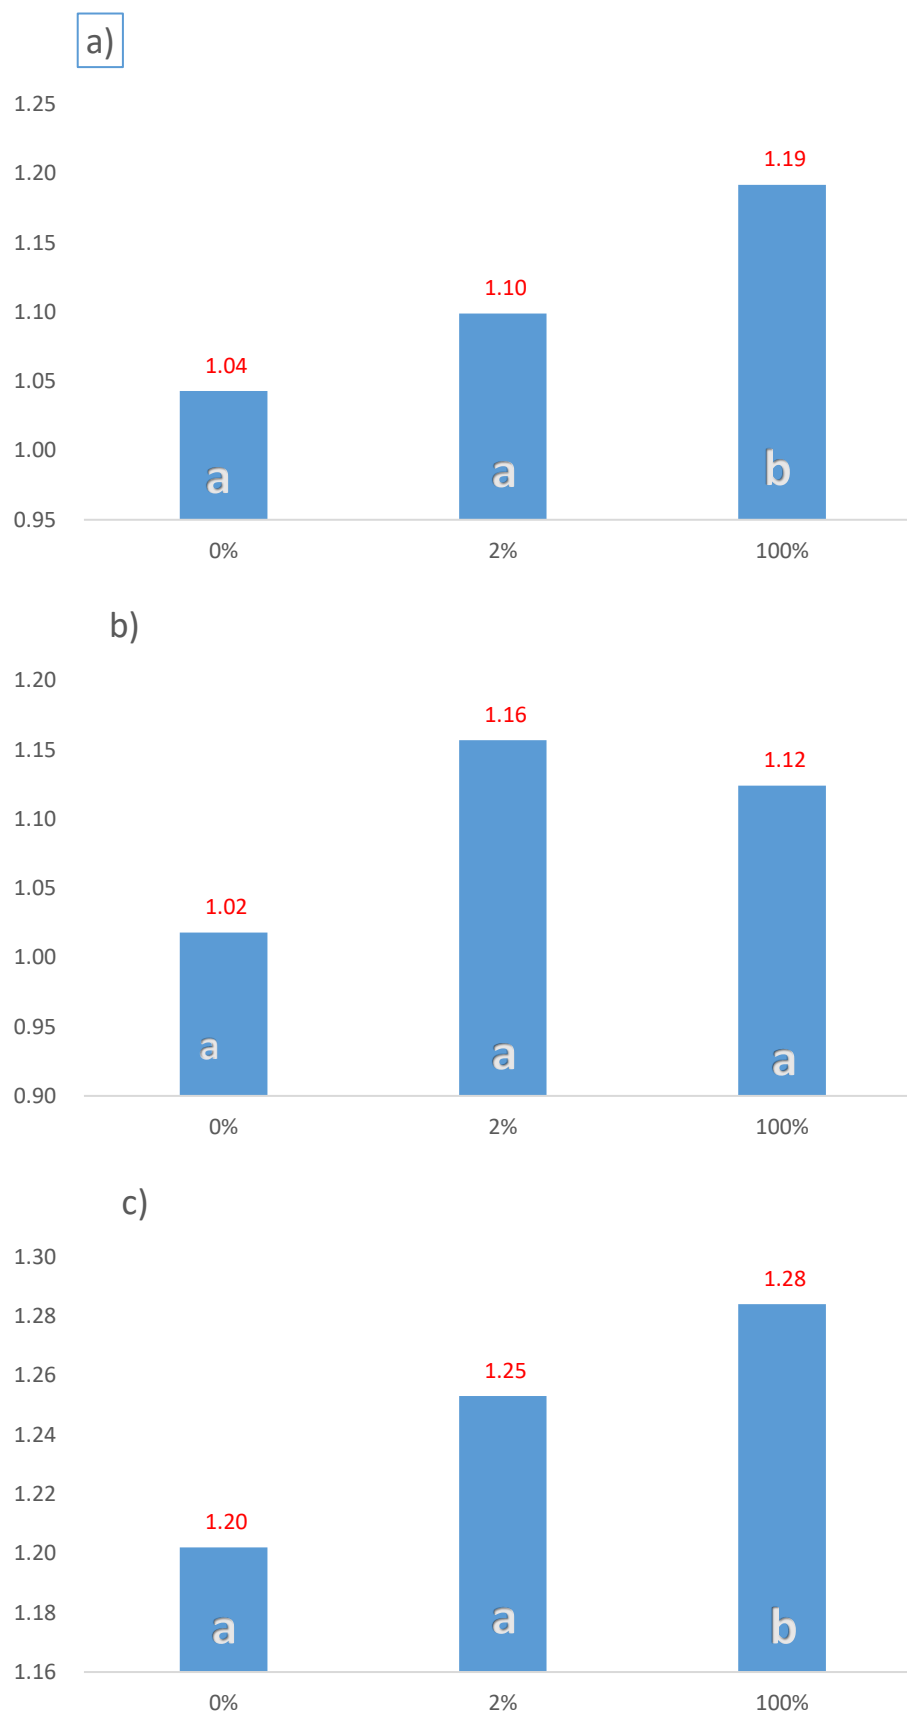

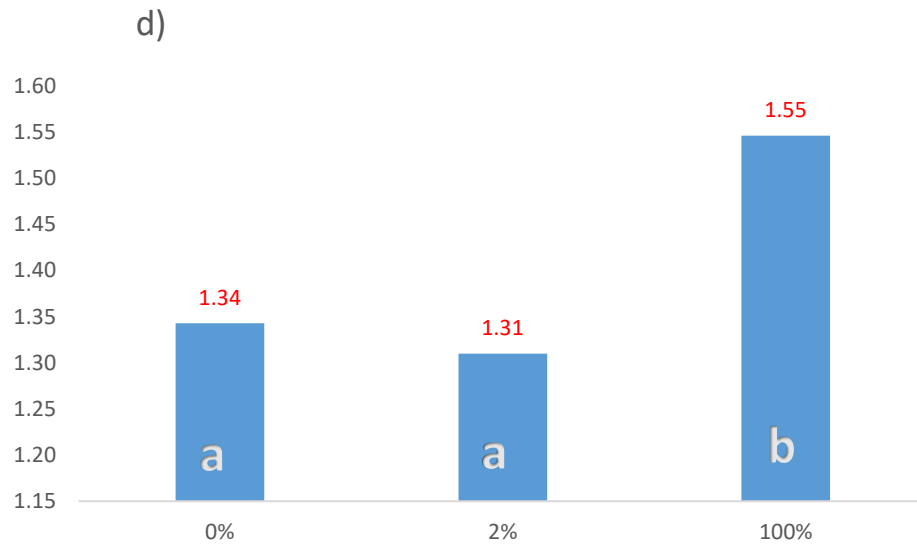

**Figure S2. Cell proliferation (optical density, OD) of four different experiments (medians) of MEC in culture for 6 days after confluence.** Essential amino acids (EAA) were added at doses of 0%, 2%, and 100% of complete DMEM concentrations for 12 h & 24 h and repletion (R) was done with 100% EAA for 12 h & 24 h. (a) 12 h depletion (D): 0% and 2% EAA. (b) 24 h D. (c) 12 h D + 12 h R. (d) 24 h D + 24 h R. In red, min. and max. values. Columns with different letters depict significant differences ( $p < 0.05$ ).

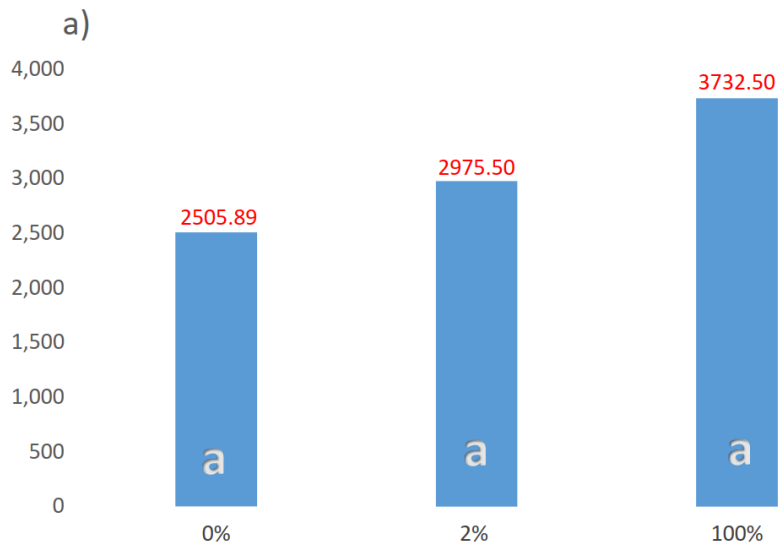

b)

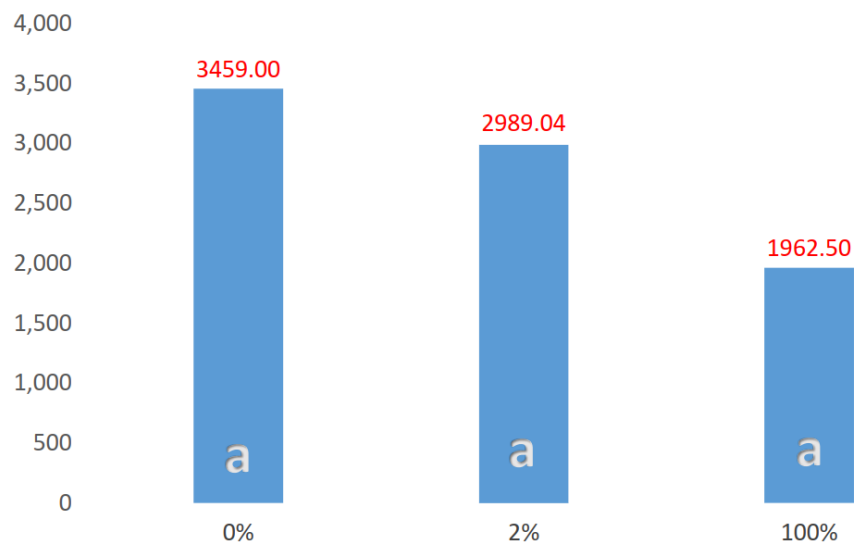

c)

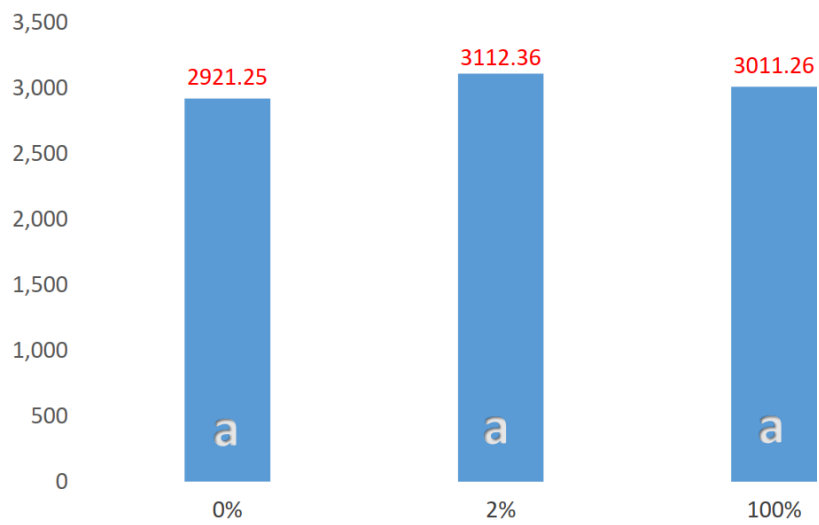

d)

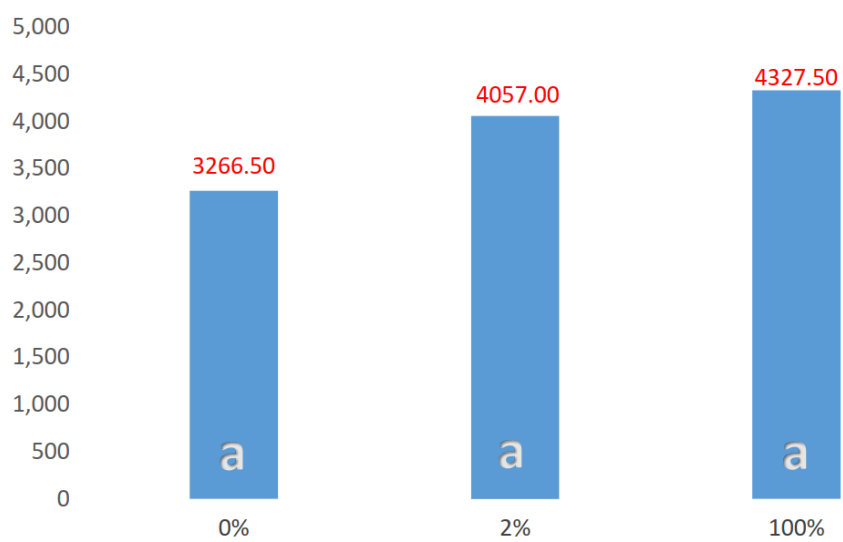

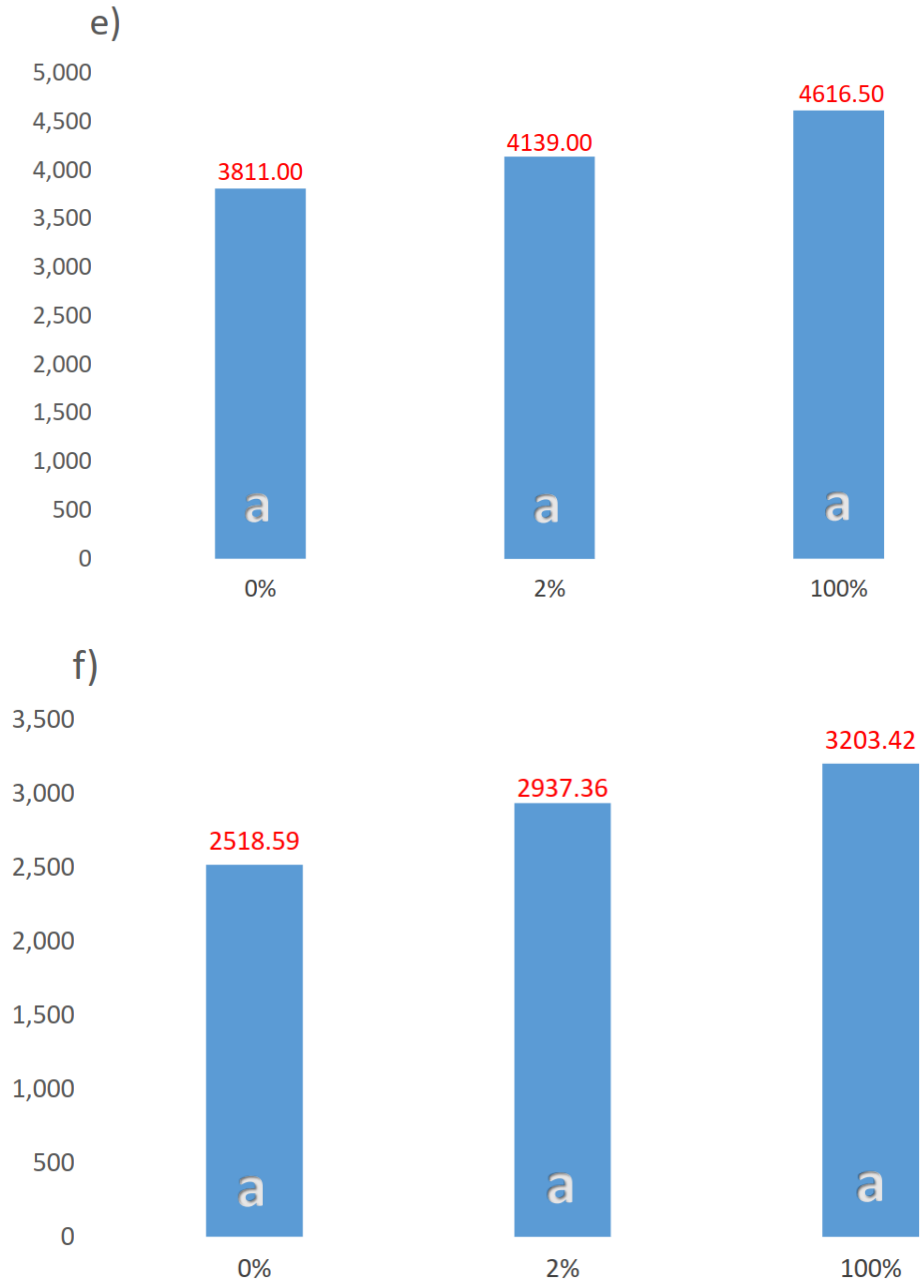

**Figure S3. Total protein (ug/mL)** of four different experiments (medians) of MEC in culture for 6 days after confluence. Essential amino acids (EAA) were added at doses of 0%, 2%, and 100% of complete DMEM concentrations for 8 h & 24 h and repletion (R) was done with 100% EAA for 8 h & 24 h. (a) 8 h depletion (D): 0% and 2% EAA. (b) 24 h D. (c) 8 h D + 8 h R. (d) 8 h D + 24 h R. (e) 24 h D + 8 h R. (f) 24 h D + 24 h R. In red, min. and max. values. Columns with different letters depict significant differences ( $p < 0.05$ ).

**Table S1.** Proteins ( $n = 16$ ) with significant different expression ( $p < 0.05$ ) in MEC. Protein absolute concentration (TOP3 ISOQuant) indicate the effect of treatment compared to the control (bold). MEC: mammary epithelial cell; EAA: essential amino acid; Trt: treatment; GSPT1: G1 to S phase transition 1; CSNK2A1: casein kinase 2 alpha 1; CDCP42: cell division control protein 42; STAT: signal transducer and activator of transcription; eIF: eukaryotic initiation factor; eEF: eukaryotic elongation factor; PEPD: peptidase D; PPI: peptidylprolyl isomerase; TPP1: tripeptidyl-peptidase 1; FKBP3: FKBP prolyl isomerase 3.

| Protein/Trt. | N                    | Mean              | Standard deviation |
|--------------|----------------------|-------------------|--------------------|
| 1. GSPT1     | 1. 2%EAA-8h          | 61518,4167        | 6529,16468         |
|              | 2. 2%EAA-24h         | 60787,5417        | 2146,97394         |
|              | 3. 2%EAA-8h+8h RF    | 61207,0000        | 7270,23361         |
|              | 4. 2%EAA-24h+24h RF  | <b>72657,7917</b> | 7531,17518         |
|              | 5. 2%EAA-8h+24h RF   | <b>60340,1250</b> | 2947,36459         |
|              | 6. 2%EAA-24h+8h RF   | <b>55079,8333</b> | 1936,64809         |
|              | 7.Control (100% EAA) | <b>63926,4167</b> | 3753,98870         |
| 2. CSNK2A1   | 1. 2%EAA-8h          | 13881,7917        | 2990,12349         |
|              | 2. 2%EAA-24h         | 15396,9444        | 2563,18171         |
|              | 3. 2%EAA-8h+8h RF    | 14603,4583        | 3275,45687         |
|              | 4. 2%EAA-24h+24h RF  | 15499,4861        | 1519,24471         |
|              | 5. 2%EAA-8h+24h RF   | <b>11568,3750</b> | 848,05662          |
|              | 6. 2%EAA-24h+8h RF   | 14307,3056        | 3224,96553         |
|              | 7.Control (100% EAA) | <b>16327,7778</b> | 916,32417          |
| 3. eIF1      | 1. 2%EAA-8h          | 19827,2500        | 5736,12375         |
|              | 2. 2%EAA-24h         | 22331,4444        | 4293,68913         |
|              | 3. 2%EAA-8h+8h RF    | <b>32237,9722</b> | 5416,49531         |
|              | 4. 2%EAA-24h+24h RF  | <b>14433,1389</b> | 5147,10302         |
|              | 5. 2%EAA-8h+24h RF   | <b>15223,8611</b> | 2668,14557         |
|              | 6. 2%EAA-24h+8h RF   | <b>30452,5278</b> | 4410,63844         |
|              | 7.Control (100% EAA) | <b>18304,9722</b> | 3623,56032         |
| 4. eIF1A     | 1. 2%EAA-8h          | 14696,1667        | 1272,23067         |
|              | 2. 2%EAA-24h         | 13527,0000        | 752,63583          |
|              | 3. 2%EAA-8h+8h RF    | 14602,1667        | 1587,77702         |
|              | 4. 2%EAA-24h+24h RF  | 13409,5833        | 1507,28572         |
|              | 5. 2%EAA-8h+24h RF   | 16902,1667        | 746,07015          |
|              | 6. 2%EAA-24h+8h RF   | <b>12992,3333</b> | 1015,04210         |
|              | 7.Control (100% EAA) | <b>16535,0833</b> | 639,64869          |
| 5. eIF2S1    | 1. 2%EAA-8h          | 26848,4444        | 2325,43013         |
|              | 2. 2%EAA-24h         | 23297,0000        | 1025,34339         |
|              | 3. 2%EAA-8h+8h RF    | <b>22371,4444</b> | 1616,11326         |
|              | 4. 2%EAA-24h+24h RF  | <b>21028,6944</b> | 673,74108          |
|              | 5. 2%EAA-8h+24h RF   | <b>26851,5000</b> | 2071,51642         |
|              | 6. 2%EAA-24h+8h RF   | 25486,7222        | 1498,41994         |
|              | 7.Control (100% EAA) | <b>25548,2222</b> | 1715,58047         |
| 6. eIF3SF    | 1. 2%EAA-8h          | <b>15437,7222</b> | 2149,27462         |
|              | 2. 2%EAA-24h         | 14467,0000        | 1862,89570         |
|              | 3. 2%EAA-8h+8h RF    | <b>21650,1111</b> | 1998,36541         |
|              | 4. 2%EAA-24h+24h RF  | 16530,6667        | 3023,74825         |
|              | 5. 2%EAA-8h+24h RF   | 16371,0000        | 1837,65537         |
|              | 6. 2%EAA-24h+8h RF   | 17482,7778        | 2181,43182         |
|              | 7.Control (100% EAA) | <b>18158,3889</b> | 544,41558          |
| 7. eIF5A     | 1. 2%EAA-8h          | 104098,0555       | 36384,26414        |
|              | 2. 2%EAA-24h         | <b>57147,8333</b> | 3629,65303         |
|              | 3. 2%EAA-8h+8h RF    | 146990,9444       | 9785,97573         |

|           |                      |   |                    |             |
|-----------|----------------------|---|--------------------|-------------|
|           | 4. 2%EAA-24h+24h RF  | 6 | 107660,5000        | 22306,12224 |
|           | 5. 2%EAA-8h+24h RF   | 6 | 123902,2778        | 7681,66169  |
|           | 6. 2%EAA-24h+8h RF   | 6 | 72752,0556         | 21310,16172 |
|           | 7.Control (100% EAA) | 6 | <b>138229,3333</b> | 6202,97205  |
| 8. eIF6   | 1. 2%EAA-8h          | 6 | 18052,0556         | 1792,68203  |
|           | 2. 2%EAA-24h         | 6 | 16811,9444         | 1160,45733  |
|           | 3. 2%EAA-8h+8h RF    | 6 | 15169,8333         | 3681,12403  |
|           | 4. 2%EAA-24h+24h RF  | 6 | 13314,5556         | 3934,47769  |
|           | 5. 2%EAA-8h+24h RF   | 6 | <b>20284,5000</b>  | 1929,52217  |
|           | 6. 2%EAA-24h+8h RF   | 6 | <b>20510,4722</b>  | 868,06696   |
|           | 7.Control (100% EAA) | 6 | <b>14069,2222</b>  | 2343,10766  |
| 9. eIF4AI | 1. 2%EAA-8h          | 6 | 93665,0556         | 3732,68439  |
|           | 2. 2%EAA-24h         | 6 | <b>82193,2778</b>  | 6141,14518  |
|           | 3. 2%EAA-8h+8h RF    | 6 | 94987,2222         | 1887,91785  |
|           | 4. 2%EAA-24h+24h RF  | 6 | <b>73982,7778</b>  | 5905,37881  |
|           | 5. 2%EAA-8h+24h RF   | 6 | <b>84060,1111</b>  | 4319,57867  |
|           | 6. 2%EAA-24h+8h RF   | 6 | 93161,0556         | 6695,84797  |
|           | 7.Control (100% EAA) | 6 | <b>98839,0000</b>  | 8292,30387  |
| 10. eEF1B | 1. 2%EAA-8h          | 6 | 110513,7778        | 6074,77321  |
|           | 2. 2%EAA-24h         | 6 | 108611,2778        | 4915,68838  |
|           | 3. 2%EAA-8h+8h RF    | 6 | 111411,6111        | 2321,30963  |
|           | 4. 2%EAA-24h+24h RF  | 6 | <b>81977,3333</b>  | 10697,50225 |
|           | 5. 2%EAA-8h+24h RF   | 6 | 103035,5000        | 12531,71038 |
|           | 6. 2%EAA-24h+8h RF   | 6 | <b>118671,5556</b> | 4299,26868  |
|           | 7.Control (100% EAA) | 6 | <b>102481,6667</b> | 4458,50327  |
| 11. eEF1D | 1. 2%EAA-8h          | 6 | 89388,9444         | 4376,28754  |
|           | 2. 2%EAA-24h         | 6 | 86975,0000         | 6976,83018  |
|           | 3. 2%EAA-8h+8h RF    | 6 | 86355,8889         | 1240,22273  |
|           | 4. 2%EAA-24h+24h RF  | 6 | <b>74357,8333</b>  | 3696,89552  |
|           | 5. 2%EAA-8h+24h RF   | 6 | 93398,1111         | 2415,30771  |
|           | 6. 2%EAA-24h+8h RF   | 6 | <b>97511,3333</b>  | 3952,54807  |
|           | 7.Control (100% EAA) | 6 | <b>82956,5556</b>  | 3606,90690  |
| 12. eEF1G | 1. 2%EAA-8h          | 6 | 40553,2500         | 8263,34519  |
|           | 2. 2%EAA-24h         | 6 | <b>33598,3333</b>  | 1252,23874  |
|           | 3. 2%EAA-8h+8h RF    | 6 | 46484,7639         | 1751,70111  |
|           | 4. 2%EAA-24h+24h RF  | 6 | 36683,6111         | 3787,42059  |
|           | 5. 2%EAA-8h+24h RF   | 6 | 48050,8333         | 6886,87825  |
|           | 6. 2%EAA-24h+8h RF   | 6 | 36544,9722         | 3222,24806  |
|           | 7.Control (100% EAA) | 6 | <b>50804,3611</b>  | 2987,20223  |
| 13. PEPD  | 1. 2%EAA-8h          | 6 | 10798,6667         | 1911,22031  |
|           | 2. 2%EAA-24h         | 6 | 10929,8333         | 1046,08497  |
|           | 3. 2%EAA-8h+8h RF    | 6 | 10375,0000         | 688,07441   |
|           | 4. 2%EAA-24h+24h RF  | 6 | 10811,6667         | 880,03470   |
|           | 5. 2%EAA-8h+24h RF   | 6 | 9811,66667         | 559,387045  |
|           | 6. 2%EAA-24h+8h RF   | 6 | <b>8992,66667</b>  | 518,63886   |
|           | 7.Control (100% EAA) | 6 | <b>12212,6667</b>  | 681,57983   |
| 14. PPIA  | 1. 2%EAA-8h          | 6 | 394485,7778        | 22825,15368 |
|           | 2. 2%EAA-24h         | 6 | <b>392097,5556</b> | 5061,23107  |
|           | 3. 2%EAA-8h+8h RF    | 6 | 373801,2778        | 7786,79842  |
|           | 4. 2%EAA-24h+24h RF  | 6 | <b>333802,8333</b> | 40100,08853 |
|           | 5. 2%EAA-8h+24h RF   | 6 | 370872,8889        | 21251,29234 |
|           | 6. 2%EAA-24h+8h RF   | 6 | 384339,5556        | 4009,78143  |
|           | 7.Control (100% EAA) | 6 | <b>385431,8889</b> | 6563,67064  |
| 15. PPIB  | 1. 2%EAA-8h          | 6 | 85435,0556         | 4400,26962  |
|           | 2. 2%EAA-24h         | 6 | <b>87978,9444</b>  | 7081,97468  |
|           | 3. 2%EAA-8h+8h RF    | 6 | 73779,4444         | 613,56060   |



|           |                      |   |                   |            |
|-----------|----------------------|---|-------------------|------------|
|           | 4. 2%EAA-24h+24h RF  | 6 | <b>63774,6667</b> | 3299,87131 |
|           | 5. 2%EAA-8h+24h RF   | 6 | <b>82999,8889</b> | 3151,96440 |
|           | 6. 2%EAA-24h+8h RF   | 6 | 90479,4444        | 2467,49988 |
|           | 7.Control (100% EAA) | 6 | <b>72142,7778</b> | 4371,20316 |
| 16. FKBP3 | 1. 2%EAA-8h          | 6 | <b>11494,8333</b> | 669,45008  |
|           | 2. 2%EAA-24h         | 6 | 10824,3333        | 589,56952  |
|           | 3. 2%EAA-8h+8h RF    | 6 | <b>10020,4444</b> | 701,17595  |
|           | 4. 2%EAA-24h+24h RF  | 6 | 10630,5000        | 578,88190  |
|           | 5. 2%EAA-8h+24h RF   | 6 | <b>11791,7778</b> | 171,26596  |
|           | 6. 2%EAA-24h+8h RF   | 6 | 10803,8889        | 304,59369  |
|           | 7.Control (100% EAA) | 6 | <b>10783,3889</b> | 550,96301  |
